# Supplementary material
Source: PubMed Central journal article supplement (PMC4248729)
Supplement: MCB.00740-14_zmb999100659so1.pdf [file MCB.00740-14_zmb999100659so1.pdf]

1 **Supplementary Figure 1.**

2 List of proteins identified in mock and HA-14-3-3 $\zeta$  immunoprecipitations (IPs) and  
3 treatments. Column B lists the identity of protein identified by mass  
4 spectrometry/HDMSE. Columns J through N show peptide counts for each  
5 interacting protein and are ordered as follows: Column F = mock transfection IP;  
6 column G = HA-14-3-3 $\zeta$  IP in 1% O<sub>2</sub>; column H = HA-14-3-3 $\zeta$  IP in 2mM glucose  
7 and 1% oxygen; column I = HA-14-3-3 $\zeta$  IP in 2mM glucose; column J = HA-14-3-  
8 3 $\zeta$  IP in normoxia (20 mM glucose, atmospheric oxygen). Data were exported to  
9 excel from Scaffold 3 Viewer. Interacting proteins that showed peptide counts in  
10 the mock IP that were comparable to other IPs are listed, but were ruled out as  
11 putative 14-3-3 $\zeta$  interacting proteins.
